# Supplementary material
Source: Elsevier journal article supplement (https://www.sciencedirect.com/science/article/pii/S1698031X17300638)

**Supporting Information**

**Fig.1.SI**. The active binding site found by the super-position of known compounds SLD, TLD and IBMX to PDE-5


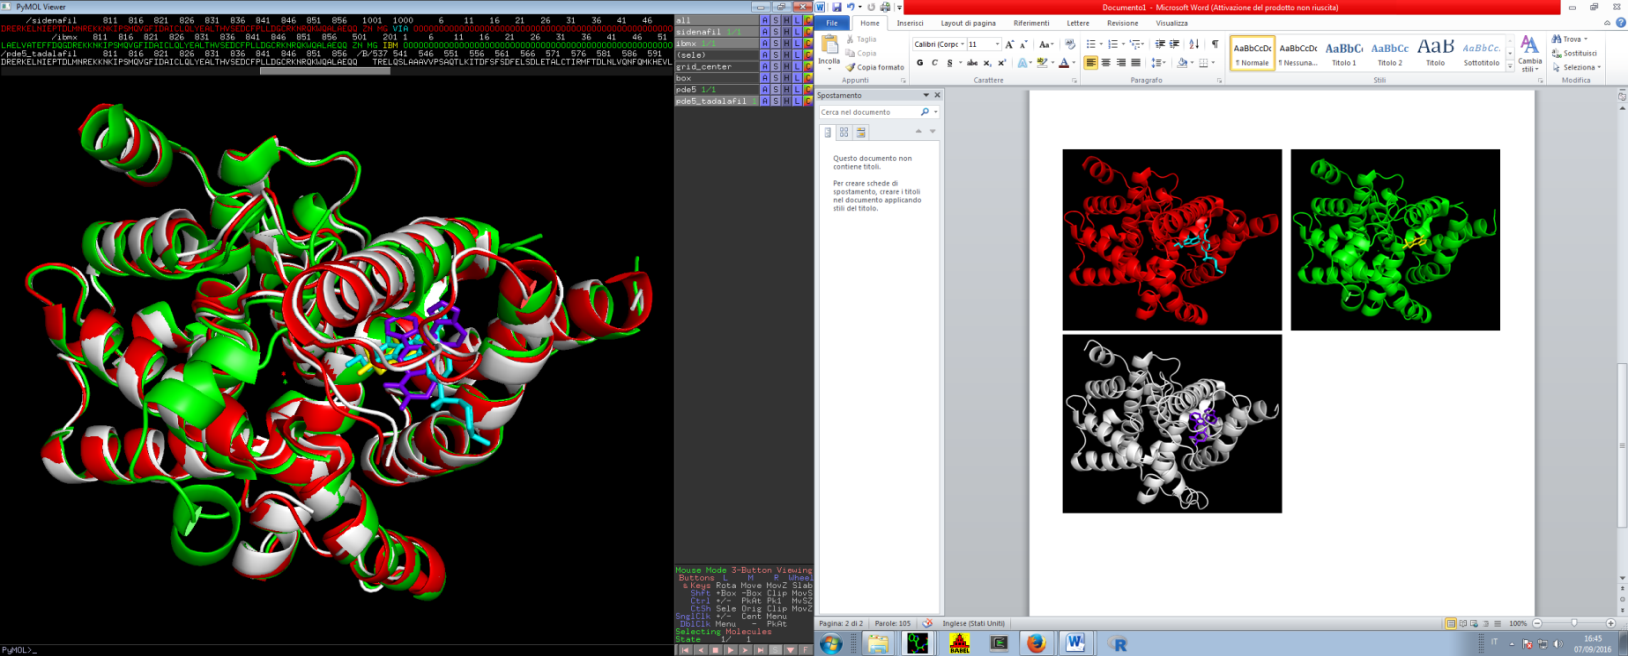

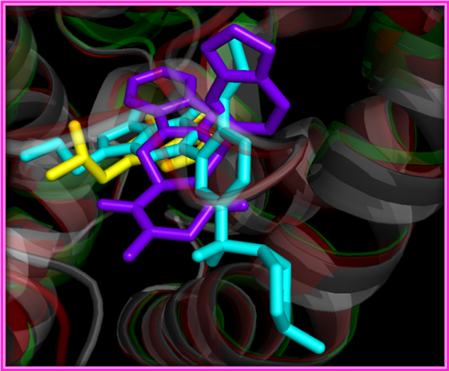


**Fig.2. SI**. Binding interactions of commercial compounds (SLD, TLD, IBMX) with amino acid residues in binding site pocket of PDE-5


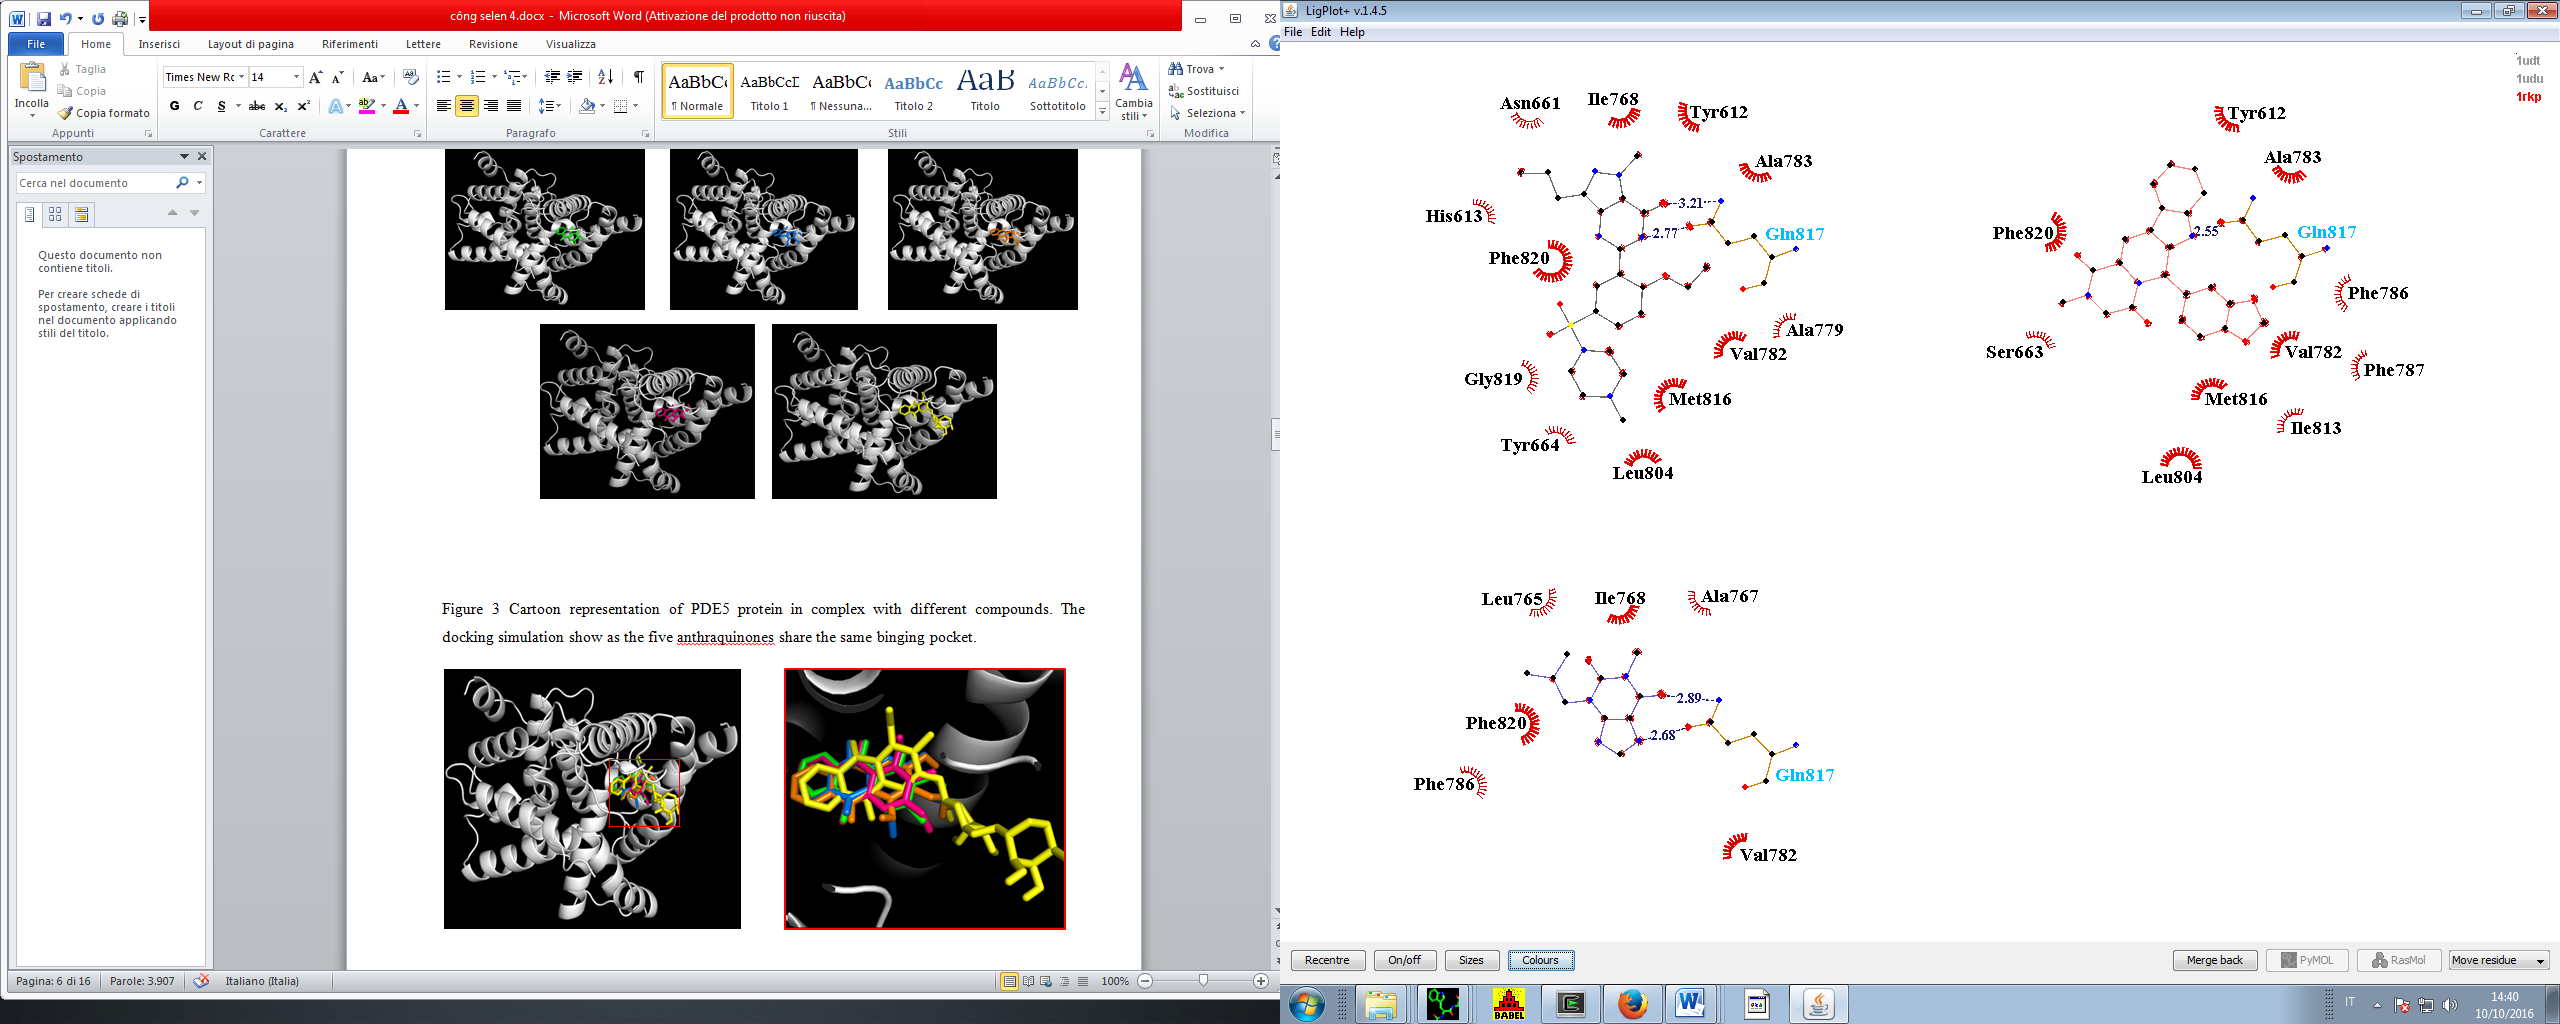

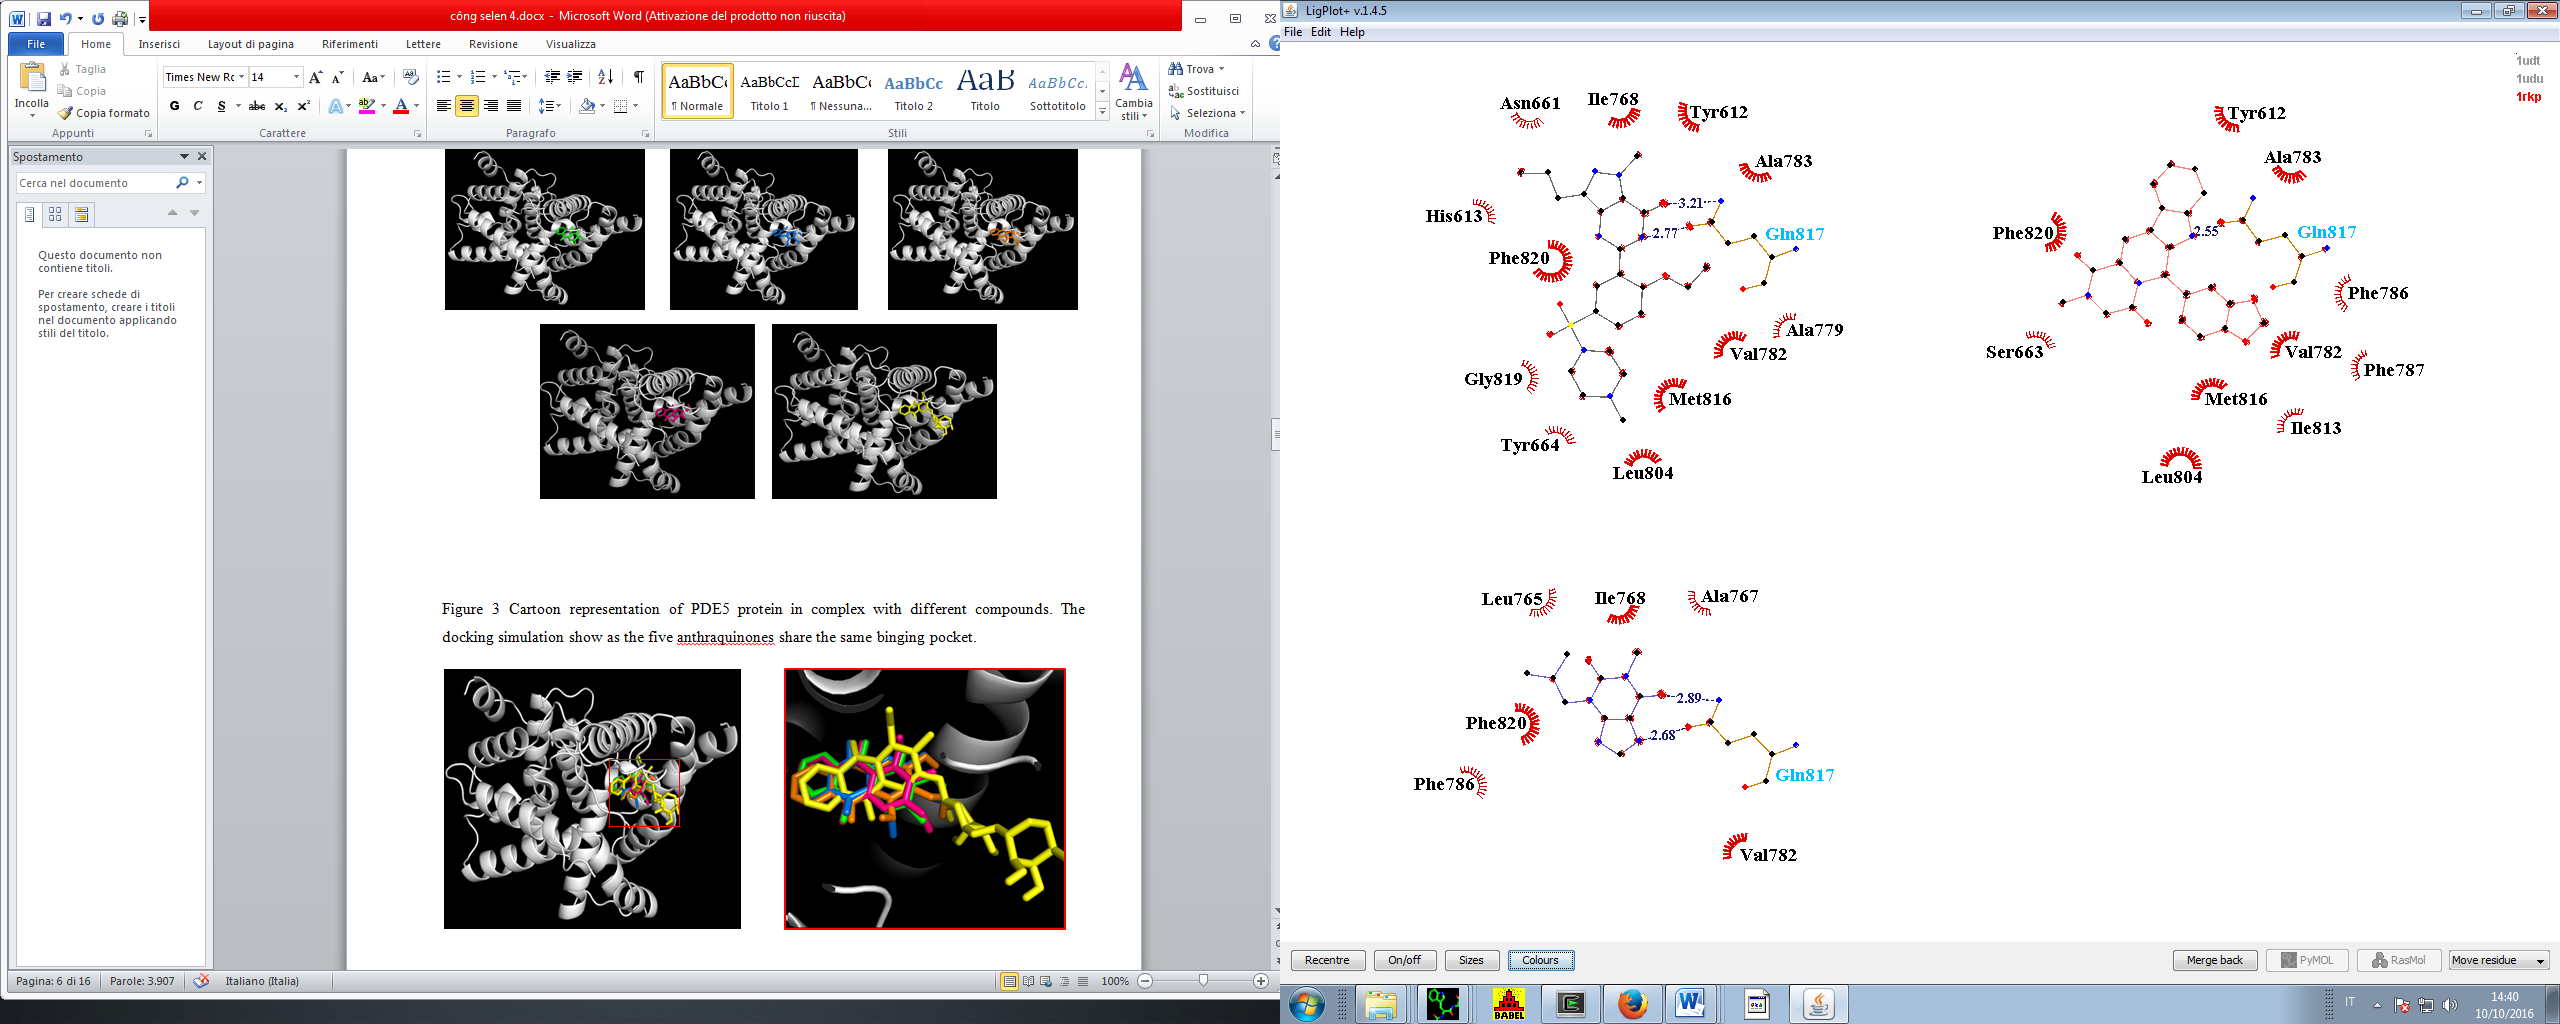


Sildenafil

Tadanafilnafil

IBMX

**Fig. 3. SI.** Values of ΔG binding energies of research compounds


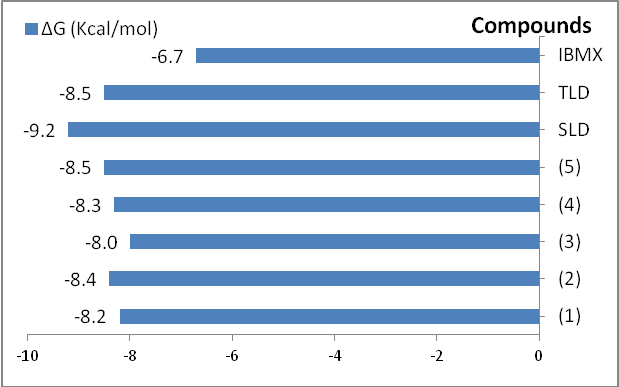

Supplement: mmc1 [file S1698031X17300638:mmc1.doc]
